# Supplementary material for: A high-quality reference genome for cabbage obtained with SMRT reveals novel genomic features and evolutionary characteristics
Source: PubMed Central journal article supplement (PMC7381634; doi:10.1038/s41598-020-69389-x), 2020-07-24
Supplement: 41598_2020_69389_MOESM1_ESM.pdf [file 41598_2020_69389_MOESM1_ESM.pdf]

## Supplementary information

### **A high-quality reference genome for cabbage obtained with SMRT reveals novel genomic features and evolutionary characteristics**

Honghao Lv<sup>#</sup>, Yong Wang<sup>#</sup>, Fengqing Han<sup>#</sup>, Jialei Ji<sup>#</sup>, Zhiyuan Fang, Mu Zhuang, Zhansheng Li, Yangyong Zhang<sup>\*</sup> and Limei Yang<sup>\*</sup>

Email addresses: lvhonghao@caas.cn; wangyong03@caas.cn; hanfengqing@caas.cn; jijialei@caas.cn; fangzhiyuan@caas.cn; zhuangmu@caas.cn; lizhansheng@caas.cn; zhangyangyong@caas.cn; yanglimei@caas.cn

Institute of Vegetables and Flowers, Chinese Academy of Agricultural Sciences, Key Laboratory of Biology and Genetic Improvement of Horticultural Crops, Ministry of Agriculture, #12 Zhong Guan Cun Nandajie Street, Beijing 100081, China

<sup>#</sup> These authors contributed equally to this work.

<sup>\*</sup> Correspondence: yanglimei@caas.cn; zhangyangyong@caas.cn; Tel.: +86-010-621-35629

**Table S1.** The links of protein sequences from sequenced genomes used for homology based gene prediction.

| <b>Species</b>              | <b>Download links</b>                                                                                                                                                                                                                                                           |
|-----------------------------|---------------------------------------------------------------------------------------------------------------------------------------------------------------------------------------------------------------------------------------------------------------------------------|
| <i>Oryza sativa</i>         | <a href="ftp://ftp.ensemblgenomes.org/pub/plants/release-32/fasta/oryza_sativa/dna/Oryza_sativa.IRGSP-1.0.dna.toplevel.fa.gz">ftp://ftp.ensemblgenomes.org/pub/plants/release-32/fasta/oryza_sativa/dna/Oryza_sativa.IRGSP-1.0.dna.toplevel.fa.gz</a>                           |
| <i>Solanum lycopersicum</i> | <a href="ftp://ftp.ensemblgenomes.org/pub/plants/release-32/fasta/solanum_lycopersicum/dna/Solanum_lycopersicum.SL2.50.dna.toplevel.fa.gz">ftp://ftp.ensemblgenomes.org/pub/plants/release-32/fasta/solanum_lycopersicum/dna/Solanum_lycopersicum.SL2.50.dna.toplevel.fa.gz</a> |
| <i>Arabidopsis thaliana</i> | <a href="ftp://ftp.ensemblgenomes.org/pub/plants/release-32/fasta/arabidopsis_thaliana/dna/Arabidopsis_thaliana.TAIR10.dna.toplevel.fa.gz">ftp://ftp.ensemblgenomes.org/pub/plants/release-32/fasta/arabidopsis_thaliana/dna/Arabidopsis_thaliana.TAIR10.dna.toplevel.fa.gz</a> |
| <i>Brassica rapa</i>        | <a href="ftp://ftp.ensemblgenomes.org/pub/plants/release-32/fasta/brassica_rapa/dna/Brassica_rapa.IVFCASv1.dna.toplevel.fa.gz">ftp://ftp.ensemblgenomes.org/pub/plants/release-32/fasta/brassica_rapa/dna/Brassica_rapa.IVFCASv1.dna.toplevel.fa.gz</a>                         |
| <i>Carica papaya</i>        | <a href="http://genome.jgi.doe.gov/pages/dynamicOrganismDownload.jsf?organism=Cpapaya">http://genome.jgi.doe.gov/pages/dynamicOrganismDownload.jsf?organism=Cpapaya</a>                                                                                                         |
| <i>Cucumis sativus</i>      | <a href="ftp://ftp.ncbi.nlm.nih.gov/genomes/refseq/plant/Cucumis_sativus/latest_assembly_versions/GCF_000004075.2_ASM407v2">ftp://ftp.ncbi.nlm.nih.gov/genomes/refseq/plant/Cucumis_sativus/latest_assembly_versions/GCF_000004075.2_ASM407v2</a>                               |
| <i>Brassica oleracea</i>    | <a href="ftp://ftp.ensemblgenomes.org/pub/plants/release-32/fasta/brassica_oleracea/dna/Brassica_oleracea.v2.1.dna.toplevel.fa.gz">ftp://ftp.ensemblgenomes.org/pub/plants/release-32/fasta/brassica_oleracea/dna/Brassica_oleracea.v2.1.dna.toplevel.fa.gz</a>                 |

**Table S2.** Summary of the *B.oleracea* genome sequencing data using the PacBio and Illumina technology.

| <b>Pair-end libraries</b> | <b>Insert size</b> | <b>Total data (G)</b> | <b>Read length (bp)</b> | <b>Sequence coverage (X)</b> |
|---------------------------|--------------------|-----------------------|-------------------------|------------------------------|
| Illumina reads            | 350bp              | 35.48                 | 150                     | 53.77                        |
| Pacbio reads              | 20Kb               | 64.72                 | -                       | 98.09                        |
| 10X Genomics              | -                  | 103.53                | 150                     | 156.90                       |
| Total                     | -                  | 203.73                | -                       | 308.76                       |

**Table S3.** Sequencing data derived from the PacBio

| <b>Read type</b> | <b>Read bases</b> | <b>Read Number</b> | <b>Read length (max)</b> | <b>Read length (mean)</b> | <b>Read length (N50)</b> |
|------------------|-------------------|--------------------|--------------------------|---------------------------|--------------------------|
| Polymerase       | 56,279,727,290    | 6,991,696          | 170,008                  | 8,049                     | 17,827                   |
| Pacbio           | 48,049,303,162    | 6,991,696          | 170,008                  | 6,872                     | 14,217                   |
| Insertsize       |                   |                    |                          |                           |                          |
| Subreads         | 56,217,049,057    | 8,337,764          | 170,008                  | 6,742                     | 13,307                   |

**Table S4.** The *B.oleracea* genome assembled by Illumina, PacBio and 10X genomics technologies.

|                    | <b>Contig length(bp)</b> | <b>Contig number</b> | <b>Scaffold (bp)</b> | <b>Scaffold number</b> |
|--------------------|--------------------------|----------------------|----------------------|------------------------|
| Number $\geq$ 2000 | -                        | 850                  | -                    | 737                    |
| N50                | 3,679,084                | 44                   | 8,126,944            | 24                     |
| N60                | 2,990,971 -              | 62                   | 5,810,225            | 33                     |
| N70                | 2,154,286                | 84                   | 4,233,605            | 44                     |
| N80                | 1,567,942                | 115                  | 2,821,861            | 61                     |
| N90                | 681,583                  | 166                  | 1,197,986            | 92                     |
| Max length         | 15,061,548               | -                    | 19,763,580           | -                      |
| Total length       | 574,951,109              | 870                  | 575,738,899          | 757                    |

**Table S5.** Summary of the content of four bases (A, T, G, C) in the assembled *B.oleracea* genome

| <b>Base type</b> | <b>Number (bp)</b> | <b>Percentage of genome (%)</b> |
|------------------|--------------------|---------------------------------|
| A                | 181,597,927        | 31.54                           |
| T                | 181,532,057        | 31.53                           |
| C                | 105,815,972        | 18.38                           |
| G                | 106,005,153        | 18.41                           |
| N                | 787,790            | 0.14                            |
| Total            | 575,738,899        | -                               |
| GC               | 211,821,125        | 36.84                           |

**Table S6.** Summary of the nine pseudomolecules constructed by Hi-C and comparison of sequence statistics of D134 with 02-12 and TO1000.

| <b>Chr</b> | <b>D134 len</b> | <b>02-12 len</b> | <b>TO1000 len</b> | <b>D134 gaps</b> | <b>02-12 gaps</b> | <b>TO1000 gaps</b> |
|------------|-----------------|------------------|-------------------|------------------|-------------------|--------------------|
| Chr1       | 46,344,982      | 38,761,720       | 43,764,888        | 25,255           | 2,714,696         | 3,885,479          |
| Chr2       | 66,135,242      | 44,046,003       | 52,886,895        | 45,012           | 3,151,275         | 4,908,337          |
| Chr3       | 71,593,516      | 57,781,463       | 64,984,695        | 32,229           | 3,621,199         | 5,341,750          |
| Chr4       | 61,201,690      | 40,895,475       | 53,719,093        | 35,120           | 2,685,082         | 4,997,697          |
| Chr5       | 56,575,524      | 32,828,328       | 46,902,585        | 56,503           | 2,150,365         | 3,976,196          |
| Chr6       | 48,348,811      | 48,346,208       | 39,822,476        | 20,815           | 3,074,796         | 3,675,693          |
| Chr7       | 56,100,936      | 40,704,471       | 48,366,697        | 40,829           | 2,868,188         | 4,315,248          |
| Chr8       | 49,091,759      | 41,516,064       | 41,758,685        | 13,287           | 2,670,662         | 3,358,903          |
| Chr9       | 65,031,924      | 40,126,856       | 54,679,868        | 60,154           | 2,710,089         | 4,885,689          |
| Total      | 520,424,384     | 385,006,588      | 446,885,882       | 329,204          | 25,646,352        | 39,344,992         |

**Table S7.** Gene structure annotation in the assembled *B.oleracea* genome

| Gene set       | Number                         | Average<br>gene<br>length<br>(bp) | Average<br>CDS<br>length<br>(bp) | Average<br>exons<br>per<br>gene | Average<br>exon<br>length<br>(bp) | Average<br>intron<br>length<br>(bp) |          |
|----------------|--------------------------------|-----------------------------------|----------------------------------|---------------------------------|-----------------------------------|-------------------------------------|----------|
| <i>de novo</i> | Augustus                       | 29,907                            | 1,635.34                         | 1,012.09                        | 4.46                              | 226.93                              | 180.13   |
|                | GlimmerHMM                     | 76,602                            | 1,234.52                         | 700.42                          | 2.97                              | 236.01                              | 271.42   |
|                | SNAP                           | 69,628                            | 1,522.48                         | 731.74                          | 4.07                              | 179.78                              | 257.55   |
|                | Geneid                         | 60,185                            | 3,701.51                         | 896.24                          | 4.46                              | 200.97                              | 810.87   |
|                | Genscan                        | 44,954                            | 7,086.98                         | 1,194.87                        | 5.79                              | 206.34                              | 1,229.89 |
|                | Arabidopsis<br>thaliana        | 70,585                            | 1,431.16                         | 915.07                          | 3.07                              | 298.46                              | 249.80   |
| Homolog        | Cucumis sativus                | 54,091                            | 1,681.65                         | 1,051.93                        | 3.30                              | 319.24                              | 274.38   |
|                | Carica papaya                  | 68,475                            | 1,169.34                         | 774.00                          | 2.66                              | 291.16                              | 238.40   |
|                | Solanum<br>lycopersicum        | 60,991                            | 1,461.57                         | 973.02                          | 2.90                              | 335.70                              | 257.33   |
|                | Brassica<br>oleracea_published | 47,889                            | 1,754.00                         | 1,037.29                        | 3.31                              | 313.54                              | 310.49   |
|                | Brassica rapa                  | 61,586                            | 1,792.03                         | 1,103.10                        | 3.40                              | 324.83                              | 287.54   |
|                | Oryza sativa                   | 50,923                            | 1,812.76                         | 1,281.20                        | 3.07                              | 417.62                              | 257.06   |
| RNA-seq        | Cufflinks                      | 74,257                            | 3,474.94                         | 1,779.39                        | 6.26                              | 284.16                              | 322.22   |
|                | PASA                           | 56,504                            | 2,293.86                         | 1,305.35                        | 5.93                              | 220.20                              | 200.59   |
| EVM            |                                | 52,503                            | 1,875.83                         | 979.01                          | 4.44                              | 220.35                              | 260.48   |
| ASA-update     |                                | 60,912                            | 2,002.59                         | 1,098.92                        | 4.99                              | 220.26                              | 226.53   |
| Final set      |                                | 44,701                            | 2,015.18                         | 1,057.81                        | 4.81                              | 219.70                              | 250.96   |



**Table S8.** Gene structure comparison of *B.oleracea* genome and other six sequenced plants.

| Species                            | Number | Average gene length (bp) | Average CDS length (bp) | Average exon length (bp) | Average intron length (bp) | Average exons per gene |
|------------------------------------|--------|--------------------------|-------------------------|--------------------------|----------------------------|------------------------|
| <i>Brassica oleracea</i>           | 44,701 | 2,015.18                 | 1,057.81                | 4.81                     | 219.70                     | 250.96                 |
| <i>Arabidopsis thaliana</i>        | 26,869 | 1,893.81                 | 1,230.33                | 5.18                     | 237.60                     | 158.80                 |
| <i>Cucumis sativus</i>             | 18,738 | 3,814.02                 | 1,362.45                | 5.84                     | 233.21                     | 506.30                 |
| <i>Carica papaya</i>               | 27,751 | 2,357.42                 | 892.86                  | 4.05                     | 220.20                     | 479.42                 |
| <i>Brassica oleracea_published</i> | 58,850 | 1,758.25                 | 1,047.21                | 4.55                     | 230.00                     | 200.12                 |
| <i>Brassica rapa</i>               | 41,006 | 2,019.16                 | 1,173.50                | 5.04                     | 232.95                     | 209.45                 |
| <i>Oryza sativa</i>                | 34,227 | 2,205.44                 | 1,003.17                | 3.83                     | 262.06                     | 425.13                 |

**Table S9.** Gene function annotation of *B.oleracea* genome.

| Database   |      | Annotated Num | Annotated<br>Percent(%) |
|------------|------|---------------|-------------------------|
| NR         |      | 43,823        | 98.0                    |
| Swiss-Prot |      | 34,008        | 76.1                    |
| KEGG       |      | 31,819        | 71.2                    |
| InterPro   | All  | 33,474        | 74.9                    |
|            | Pfam | 32,736        | 73.2                    |
|            | GO   | 23,646        | 52.9                    |
| Annotated  |      | 43,842        | 98.1                    |
| Total      |      | 44,701        | -                       |

**Table S10.** ncRNA annotation of *B.oleracea* genome.

| Type  |          | Copy (w*) | Average length (bp) | Total length (bp) | % of genome |
|-------|----------|-----------|---------------------|-------------------|-------------|
| miRNA |          | 1,764     | 101.15              | 178,432           | 0.03        |
| tRNA  |          | 1,356     | 75.18               | 101,950           | 0.02        |
| rRNA  | rRNA     | 2,461     | 360.86              | 888,081           | 0.15        |
|       | 18S      | 404       | 1,355.54            | 547,641           | 0.09        |
|       | 28S      | 1,168     | 128.71              | 150,333           | 0.03        |
|       | 5.8S     | 309       | 387.15              | 119,630           | 0.02        |
|       | 5S       | 580       | 121.51              | 70,477            | 0.01        |
| snRNA | snRNA    | 2,453     | 109.28              | 268,061           | 0.05        |
|       | CD-box   | 2,138     | 105.30              | 225,142           | 0.04        |
|       | HACA-box | 93        | 129.20              | 12,016            | 0.00        |
|       | splicing | 219       | 138.88              | 30,414            | 0.00        |

**Table S11.** Information of the repeat elements in the assembled *B.oleracea* genome

|         | Denovo+Rebase  |                | TE Proteins    |                | Combined TEs   |                |
|---------|----------------|----------------|----------------|----------------|----------------|----------------|
|         | Length<br>(bp) | % in<br>Genome | Length<br>(bp) | % in<br>Genome | Length<br>(bp) | % in<br>Genome |
| DNA     | 63,719,816     | 11.06          | 26,203,297     | 4.55           | 71,316,308     | 12.38          |
| LINE    | 19,019,814     | 3.30           | 20,217,044     | 3.51           | 29,268,060     | 5.08           |
| SINE    | 106,379        | 0.02           | 0              | 0.00           | 106,379        | 0.02           |
| LTR     | 194,636,860    | 33.81          | 73,687,154     | 12.80          | 19,8105,775    | 34.41          |
| Other   | 56,488         | 0.01           | 0              | 0.00           | 56,488         | 0.01           |
| Unknown | 15,300,151     | 2.66           | 0              | 0.00           | 15,300,151     | 2.66           |
| Total   | 304,233,388    | 52.84          | 119,902,851    | 20.82          | 318,083,209    | 55.25          |

**Table S12.** The GO term enrichment of *B.oleracea* (D134) expanded gene families.

| GO ID      | GO Term                                                | GO    | P value  | Adjusted | x1  | x2    | n   | N     | GO    |
|------------|--------------------------------------------------------|-------|----------|----------|-----|-------|-----|-------|-------|
|            |                                                        | Class |          | P value  |     |       |     |       | level |
| GO:0004713 | protein tyrosine kinase activity                       | MF    | 9.12E-29 | 3.99E-26 | 62  | 1357  | 298 | 23646 | 7     |
| GO:0019538 | protein metabolic process                              | BP    | 1.53E-25 | 3.34E-23 | 108 | 3488  | 298 | 23646 | 4     |
| GO:0044238 | primary metabolic process                              | BP    | 1.12E-24 | 1.62E-22 | 187 | 8162  | 298 | 23646 | 3     |
| GO:0016310 | phosphorylation                                        | BP    | 1.07E-23 | 1.17E-21 | 64  | 1604  | 298 | 23646 | 6     |
| GO:0006468 | protein phosphorylation                                | BP    | 1.85E-23 | 1.62E-21 | 62  | 1534  | 298 | 23646 | 7     |
| GO:0071704 | organic substance metabolic process                    | BP    | 3.03E-23 | 2.20E-21 | 188 | 8407  | 298 | 23646 | 3     |
| GO:0004672 | protein kinase activity                                | MF    | 6.89E-23 | 4.30E-21 | 62  | 1556  | 298 | 23646 | 6     |
| GO:0043228 | non-membrane-bounded organelle                         | CC    | 1.75E-22 | 8.49E-21 | 42  | 838   | 298 | 23646 | 3     |
| GO:0043232 | intracellular non-membrane-bounded organelle           | CC    | 1.75E-22 | 8.49E-21 | 42  | 838   | 298 | 23646 | 4     |
| GO:0044267 | cellular protein metabolic process                     | BP    | 3.99E-21 | 1.74E-19 | 92  | 2992  | 298 | 23646 | 5     |
| GO:0043170 | macromolecule metabolic process                        | BP    | 2.33E-20 | 8.04E-19 | 146 | 6053  | 298 | 23646 | 4     |
| GO:0006464 | cellular protein modification process                  | BP    | 2.39E-20 | 8.04E-19 | 66  | 1833  | 298 | 23646 | 6     |
| GO:0036211 | protein modification process                           | BP    | 2.39E-20 | 8.04E-19 | 66  | 1833  | 298 | 23646 | 5     |
| GO:0008152 | metabolic process                                      | BP    | 1.12E-19 | 3.48E-18 | 217 | 11016 | 298 | 23646 | 2     |
| GO:0043412 | macromolecule modification                             | BP    | 3.86E-19 | 1.13E-17 | 66  | 1894  | 298 | 23646 | 5     |
| GO:0016773 | phosphotransferase activity, alcohol group as acceptor | MF    | 5.05E-18 | 1.38E-16 | 62  | 1776  | 298 | 23646 | 5     |
| GO:0006793 | phosphorus metabolic process                           | BP    | 6.53E-18 | 1.59E-16 | 71  | 2191  | 298 | 23646 | 4     |
| GO:0006796 | phosphate-containing compound metabolic process        | BP    | 6.53E-18 | 1.59E-16 | 71  | 2191  | 298 | 23646 | 5     |
| GO:0016301 | kinase activity                                        | MF    | 1.06E-17 | 2.43E-16 | 62  | 1793  | 298 | 23646 | 5     |
| GO:0032991 | macromolecular complex                                 | CC    | 1.56E-17 | 3.41E-16 | 59  | 1670  | 298 | 23646 | 2     |

Note: x1: gene number with a GO term in the list; x2: gene number with a GO term in total; n: gene number in the list; N: total gene number.

**Table S13.** The GO term enrichment of *B. oleracea* (D134) contracted gene families.

| GO ID      | GO Term                                                                                               | GO Class | P value   | Adjusted P value | x1  | x2   | n   | N     | GO level |
|------------|-------------------------------------------------------------------------------------------------------|----------|-----------|------------------|-----|------|-----|-------|----------|
| GO:0022804 | active transmembrane transporter activity                                                             | MF       | 9.62E-136 | 3.02E-133        | 69  | 360  | 425 | 23646 | 4        |
| GO:0022857 | transmembrane transporter activity                                                                    | MF       | 4.72E-76  | 7.40E-74         | 87  | 868  | 425 | 23646 | 3        |
| GO:0022891 | substrate-specific transmembrane transporter activity                                                 | MF       | 3.01E-66  | 3.15E-64         | 69  | 640  | 425 | 23646 | 4        |
| GO:0005215 | transporter activity                                                                                  | MF       | 2.85E-65  | 2.23E-63         | 96  | 1147 | 425 | 23646 | 2        |
| GO:0022892 | substrate-specific transporter activity                                                               | MF       | 1.56E-61  | 9.78E-60         | 69  | 676  | 425 | 23646 | 3        |
| GO:0008324 | cation transmembrane transporter activity                                                             | MF       | 7.82E-56  | 4.09E-54         | 52  | 442  | 425 | 23646 | 6        |
| GO:0044765 | single-organism transport                                                                             | BP       | 4.04E-49  | 1.81E-47         | 100 | 1480 | 425 | 23646 | 3        |
| GO:0016021 | integral to membrane                                                                                  | CC       | 3.69E-45  | 1.45E-43         | 85  | 1193 | 425 | 23646 | 4        |
| GO:0031224 | intrinsic to membrane                                                                                 | CC       | 1.74E-43  | 6.07E-42         | 85  | 1222 | 425 | 23646 | 3        |
| GO:0044425 | membrane part                                                                                         | CC       | 7.52E-43  | 2.36E-41         | 97  | 1531 | 425 | 23646 | 2        |
| GO:0006812 | cation transport                                                                                      | BP       | 1.40E-42  | 3.99E-41         | 52  | 541  | 425 | 23646 | 5        |
| GO:0015075 | ion transmembrane transporter activity                                                                | MF       | 1.29E-41  | 3.36E-40         | 52  | 550  | 425 | 23646 | 5        |
| GO:0006811 | ion transport                                                                                         | BP       | 2.13E-39  | 5.14E-38         | 56  | 649  | 425 | 23646 | 4        |
| GO:0005506 | iron ion binding                                                                                      | MF       | 5.36E-37  | 1.20E-35         | 47  | 503  | 425 | 23646 | 7        |
| GO:0020037 | heme binding                                                                                          | MF       | 1.24E-35  | 2.59E-34         | 46  | 498  | 425 | 23646 | 5        |
| GO:0046906 | tetrapyrrole binding                                                                                  | MF       | 1.96E-35  | 3.84E-34         | 46  | 500  | 425 | 23646 | 4        |
| GO:0016705 | oxidoreductase activity, acting on paired donors, with incorporation or reduction of molecular oxygen | MF       | 7.49E-34  | 1.38E-32         | 50  | 595  | 425 | 23646 | 4        |
| GO:0019829 | cation-transporting ATPase activity                                                                   | MF       | 2.00E-32  | 3.30E-31         | 34  | 112  | 425 | 23646 | 7        |
| GO:0042625 | ATPase activity, coupled to transmembrane movement of ions                                            | MF       | 2.00E-32  | 3.30E-31         | 34  | 112  | 425 | 23646 | 6        |
| GO:0006810 | transport                                                                                             | BP       | 2.66E-31  | 3.97E-30         | 110 | 2228 | 425 | 23646 | 3        |

Note: x1: gene number with a GO term in the list; x2: gene number with a GO term in total; n: gene number in the list; N: total gene number.

**Table S14.** The KEGG Pathway enrichment of *B.oleracea* (D134) expanded gene families.

| Map ID   | Map Title                                   | P value  | Adjusted<br>P value | x  | y   | n   | N     |
|----------|---------------------------------------------|----------|---------------------|----|-----|-----|-------|
| map00040 | Pentose and glucuronate interconversions    | 8.11E-27 | 7.50E-25            | 37 | 411 | 371 | 20138 |
| map03430 | Mismatch repair                             | 2.18E-06 | 2.37E-05            | 24 | 507 | 371 | 20138 |
| map03440 | Homologous recombination                    | 4.45E-06 | 4.33E-05            | 25 | 553 | 371 | 20138 |
| map03030 | DNA replication                             | 1.38E-05 | 0.000106            | 24 | 545 | 371 | 20138 |
| map03420 | Nucleotide excision repair                  | 4.34E-05 | 0.000297            | 24 | 572 | 371 | 20138 |
| map00750 | Vitamin B6 metabolism                       | 9.79E-05 | 0.000647            | 6  | 41  | 371 | 20138 |
| map00196 | Photosynthesis-antenna proteins             | 0.000112 | 0.000717            | 6  | 42  | 371 | 20138 |
| map00520 | Amino sugar and nucleotide sugar metabolism | 0.000592 | 0.002959            | 16 | 366 | 371 | 20138 |
| map00906 | Carotenoid biosynthesis                     | 0.002375 | 0.008789            | 7  | 99  | 371 | 20138 |
| map04660 | T cell receptor signaling pathway           | 0.002848 | 0.010331            | 8  | 130 | 371 | 20138 |
| map04144 | Endocytosis                                 | 0.006982 | 0.022662            | 23 | 707 | 371 | 20138 |
| map03010 | Ribosome                                    | 0.008926 | 0.027723            | 26 | 842 | 371 | 20138 |
| map04062 | Chemokine signaling pathway                 | 0.009087 | 0.027723            | 8  | 158 | 371 | 20138 |
| map00073 | Cutin, suberine and wax biosynthesis        | 0.009141 | 0.027723            | 9  | 191 | 371 | 20138 |

Note: x: gene number with a KEGG term in the list; y: gene number with a KEGG term in total; n: gene number in the list; N: total gene number.

**Table S15.** The KEGG Pathway enrichment of *B.oleracea* (D134) contracted gene families.

| Map ID   | Map Title                                             | P value  | Adjusted<br>P value | x  | y   | n   | N     |
|----------|-------------------------------------------------------|----------|---------------------|----|-----|-----|-------|
| map00624 | Polycyclic aromatic hydrocarbon degradation           | 2.63E-38 | 1.50E-36            | 38 | 126 | 318 | 20138 |
| map00903 | Limonene and pinene degradation                       | 2.45E-35 | 9.29E-34            | 38 | 148 | 318 | 20138 |
| map00627 | Aminobenzoate degradation                             | 9.73E-35 | 2.77E-33            | 38 | 153 | 318 | 20138 |
| map00945 | Stilbenoid, diarylheptanoid and gingerol biosynthesis | 1.02E-33 | 2.33E-32            | 38 | 162 | 318 | 20138 |
| map00624 | Polycyclic aromatic hydrocarbon degradation           | 2.63E-38 | 1.50E-36            | 38 | 126 | 318 | 20138 |
| map00903 | Limonene and pinene degradation                       | 2.45E-35 | 9.29E-34            | 38 | 148 | 318 | 20138 |
| map00627 | Aminobenzoate degradation                             | 9.73E-35 | 2.77E-33            | 38 | 153 | 318 | 20138 |
| map00945 | Stilbenoid, diarylheptanoid and gingerol biosynthesis | 1.02E-33 | 2.33E-32            | 38 | 162 | 318 | 20138 |
| map03440 | Homologous recombination                              | 7.97E-10 | 7.57E-09            | 27 | 553 | 318 | 20138 |
| map00531 | Glycosaminoglycan degradation                         | 2.49E-09 | 2.02E-08            | 13 | 93  | 318 | 20138 |
| map03420 | Nucleotide excision repair                            | 2.79E-09 | 2.12E-08            | 27 | 572 | 318 | 20138 |
| map00052 | Galactose metabolism                                  | 8.71E-09 | 6.21E-08            | 18 | 213 | 318 | 20138 |
| map04626 | Plant-pathogen interaction                            | 2.46E-08 | 1.65E-07            | 34 | 859 | 318 | 20138 |
| map00600 | Sphingolipid metabolism                               | 2.82E-06 | 1.69E-05            | 13 | 168 | 318 | 20138 |
| map00511 | Other glycan degradation                              | 4.71E-06 | 2.68E-05            | 13 | 176 | 318 | 20138 |
| map00966 | Glucosinolate biosynthesis                            | 1.63E-05 | 8.86E-05            | 6  | 35  | 318 | 20138 |
| map00380 | Tryptophan metabolism                                 | 4.47E-05 | 0.000232            | 10 | 131 | 318 | 20138 |
| map00500 | Starch and sucrose metabolism                         | 0.000217 | 0.001078            | 28 | 890 | 318 | 20138 |
| map04142 | Lysosome                                              | 0.001034 | 0.004913            | 13 | 327 | 318 | 20138 |
| map04144 | Endocytosis                                           | 0.004142 | 0.016282            | 21 | 707 | 318 | 20138 |
| map00909 | Sesquiterpenoid and triterpenoid biosynthesis         | 0.004687 | 0.017236            | 5  | 69  | 318 | 20138 |

Note: x: gene number with a KEGG term in the list; y: gene number with a KEGG term in total; n: gene number in the list; N: total gene number.



**Table S16.** The GO term enrichment of positive selected genes in *B.oleracea* (D134).

| <b>GO ID</b> | <b>GO Term</b>    | <b>GO Class</b> | <b>P value</b> | <b>Adjusted P value</b> | <b>x1</b> | <b>x2</b> | <b>n</b> | <b>N</b> | <b>GO level</b> |
|--------------|-------------------|-----------------|----------------|-------------------------|-----------|-----------|----------|----------|-----------------|
| GO:0004518   | nuclease activity | MF              | 4.35E-06       | 0.001341                | 6         | 136       | 74       | 23646    | 5               |
| GO:0034470   | ncRNA processing  | BP              | 0.000256       | 0.039356                | 4         | 98        | 74       | 23646    | 7               |

Note: x1: gene number with a GO term in the list; x2: gene number with a GO term in total; n: gene number in the list; N: total gene number.

**Table S17.** The KEGG Pathway enrichment of positive selected genes in *B.oleracea* (D134).

| <b>Map ID</b> | <b>Map Title</b>         | <b>P value</b>  | <b>Adjusted<br/>P value</b> | <b>x</b> | <b>y</b> | <b>n</b> | <b>N</b> |
|---------------|--------------------------|-----------------|-----------------------------|----------|----------|----------|----------|
| map00360      | Phenylalanine metabolism | 0.0357898<br>21 | 0.4877965<br>84             | 2        | 109      | 55       | 20138    |
| map00350      | Tyrosine metabolism      | 0.0394484<br>66 | 0.4877965<br>84             | 2        | 115      | 55       | 20138    |
| map00195      | Photosynthesis           | 0.0498559<br>19 | 0.4877965<br>84             | 2        | 131      | 55       | 20138    |
| map00561      | Glycerolipid metabolism  | 0.0599883<br>09 | 0.5278971<br>24             | 3        | 327      | 55       | 20138    |

Note: x: gene number with a KEGG term in the list; y: gene number with a KEGG term in total; n: gene number in the list; N: total gene number.

**Table S18.** Summary of aligned sequences, SNP and Indels in D134, 02-12, and TO1000 genomes.

|                            | <b>D134 to 02-12</b> | <b>D134 to TO1000</b> |
|----------------------------|----------------------|-----------------------|
|                            | D134                 | D134                  |
| One to one syntenic blocks | 263,303,513 (68.39%) | 318,544,807 (55.39%)  |
|                            | 02-12                | TO1000                |
|                            | 263,435,105 (45.78%) | 318,737,431 (65.19%)  |
| SNPs                       | 2,057,052            | 3,963,977             |
| INDELS                     | 434,689              | 581,173               |
| Insertions(<100bp)         | 218,423              | 292,689               |
| Deletions(<100bp)          | 216,266              | 288,484               |

**Table S19.** Genome distribution of SNP and Indels between D134 and 02-12 genomes.

| Region            | SNPs                |             | D134/02-12 Insertion |             | D134/02-12 Deletion |             |
|-------------------|---------------------|-------------|----------------------|-------------|---------------------|-------------|
|                   | Number <sup>#</sup> | Percent     | Number <sup>#</sup>  | Percent     | Number <sup>#</sup> | Percent     |
| Intergenic        | 1549415             | 0.753221114 | 144615               | 0.662086868 | 142844              | 0.66050142  |
| Upstream<br>5kb   | 123316              | 0.059947925 | 22586                | 0.103404861 | 22415               | 0.103645511 |
| exonic            | 161046              | 0.078289708 | 6099                 | 0.027922884 | 6248                | 0.028890348 |
| Intron            | 104918              | 0.051004058 | 23996                | 0.109860225 | 23687               | 0.109527156 |
| UP/DOWN           | 13306               | 0.00646848  | 3435                 | 0.015726366 | 3481                | 0.016095919 |
| Downstream<br>5kb | 104750              | 0.050922388 | 17444                | 0.079863384 | 17461               | 0.080738535 |
| splice            | 301                 | 0.000146326 | 205                  | 0.000938546 | 130                 | 0.000601112 |
| Total             | 2057052             | 1           | 218423               | 1           | 216266              | 1           |

<sup>#</sup> The statistics was based on the annotation of D134 genome.

**Table S20.** Genome distribution of SNP and Indels between D134 and TO1000 genomes.

| <b>Region</b>     | <b>SNPs</b>         |             | <b>D134/TO1000 Insertion</b> |             | <b>D134/TO1000 Deletion</b> |             |
|-------------------|---------------------|-------------|------------------------------|-------------|-----------------------------|-------------|
|                   | Number <sup>#</sup> | Percent     | Number <sup>#</sup>          | Percent     | Number <sup>#</sup>         | Percent     |
| Intergenic        | 2569338             | 0.648171773 | 159427                       | 0.544697614 | 156958                      | 0.544078701 |
| Upstream<br>5kb   | 347841              | 0.087750509 | 40464                        | 0.138249131 | 39873                       | 0.138215638 |
| exonic            | 388164              | 0.097922869 | 10388                        | 0.035491597 | 10871                       | 0.037683199 |
| Intron            | 302484              | 0.076308213 | 41964                        | 0.143374025 | 41487                       | 0.143810402 |
| UP/DOWN           | 48077               | 0.012128476 | 7247                         | 0.02476007  | 7180                        | 0.024888729 |
| Downstream<br>5kb | 306089              | 0.077217653 | 32774                        | 0.11197551  | 31834                       | 0.110349274 |
| splice            | 1951                | 0.000492182 | 360                          | 0.001229974 | 280                         | 0.000970591 |
| Total             | 3963977             | 1           | 292689                       | 1           | 288484                      | 1           |

<sup>#</sup> The statistics was based on the annotation of D134 genome.

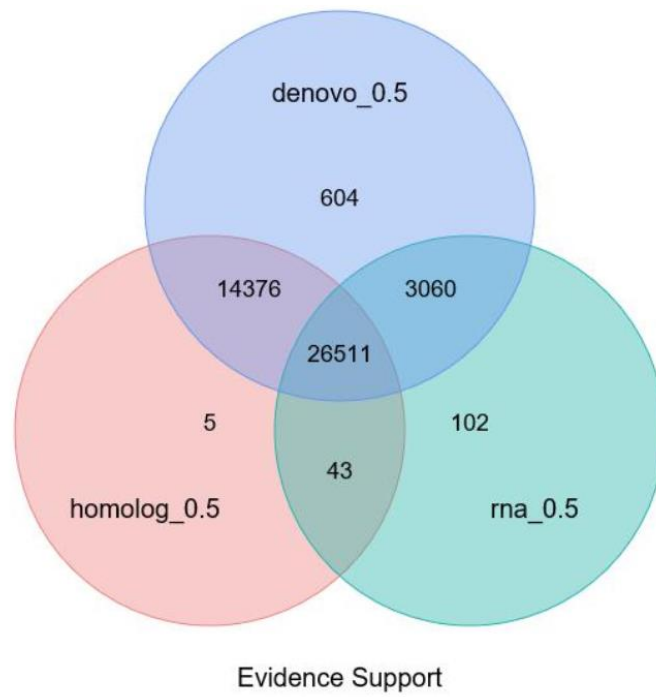

**Fig. S1. gene annotation of *B.oleracea* genome.** Gene sets generated from the three methods (*De novo* prediction, Homology searching and RNA-seq mapping) are shown.

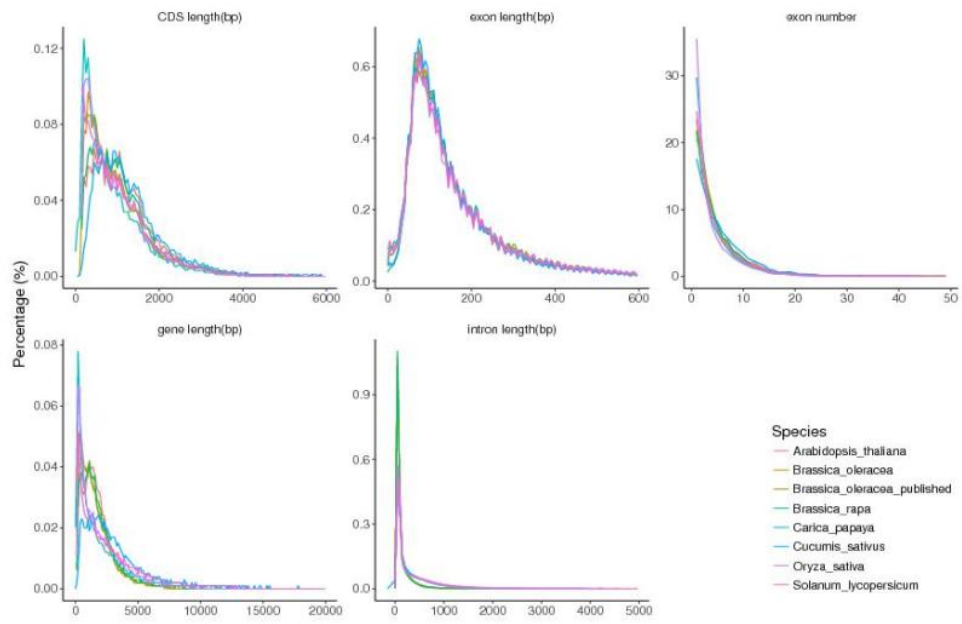

**Fig. S2. Gene structure comparison of *B.oleracea* and other six plants. *B. oleracea*, Arabidopsis and *B. rapa* are close relatives, *B. oleracea* (published) respects 02-12 assembly.**

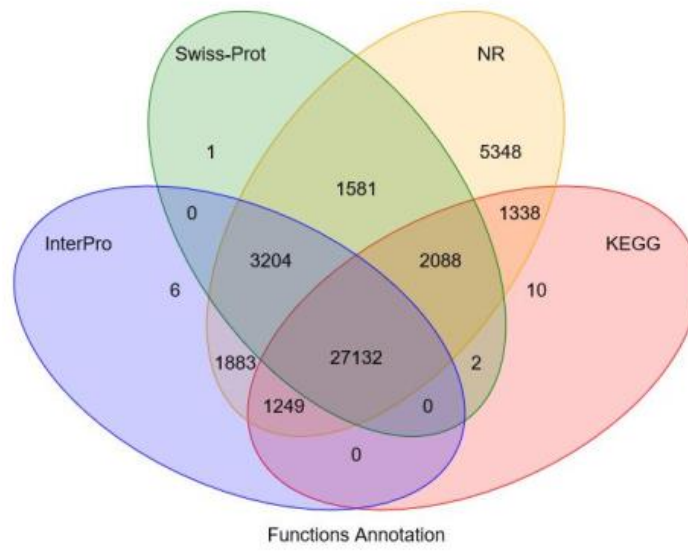

**Fig. S3. gene functional annotation of *B.oleracea* genome.** Gene sets supported by four databases are shown.



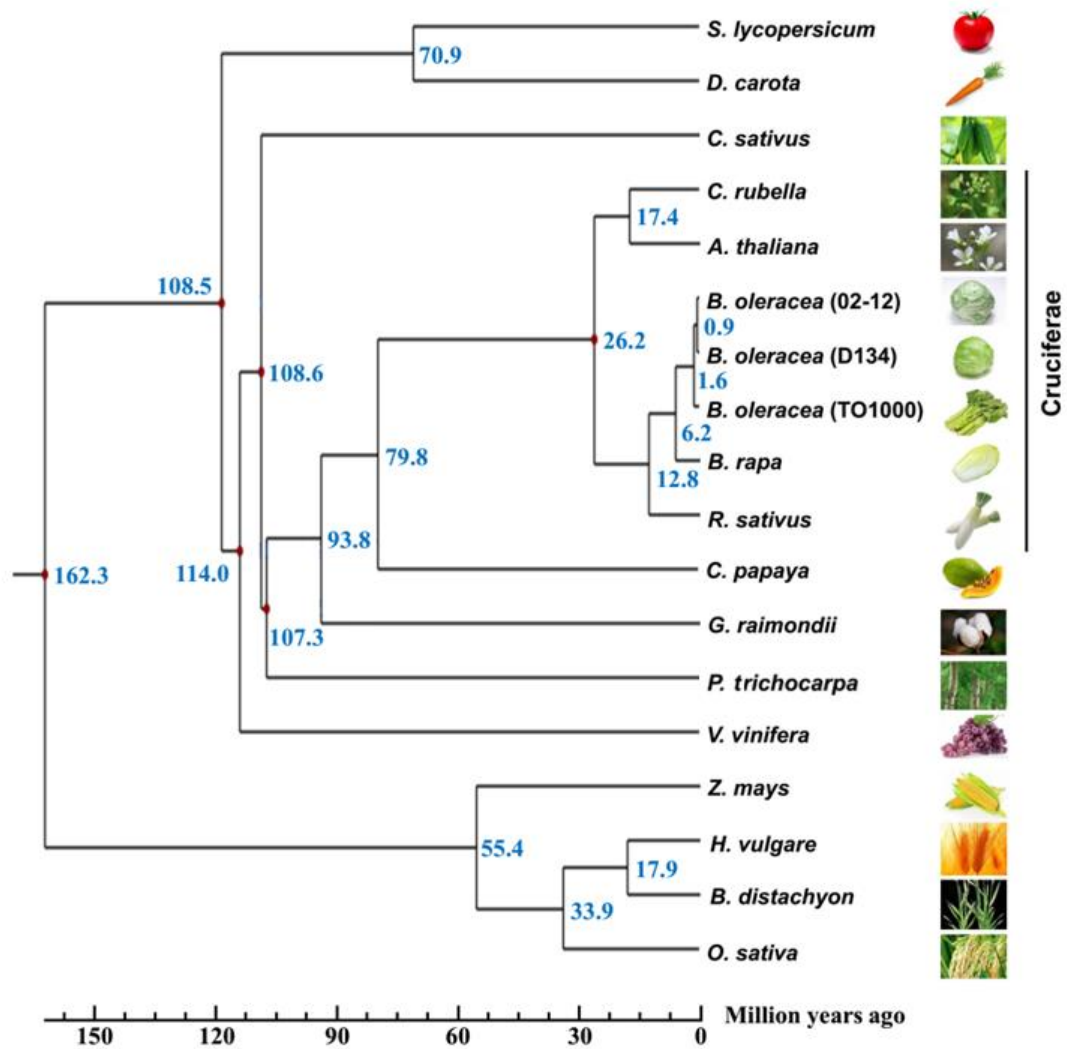

**Fig. S4. Phylogenetic tree showing the topology and divergence times for 18 genomes.** The phylogenetic tree was constructed based on a concatenated sequence alignment of 432 single-copy gene families from 18 plant species using RAxML software.

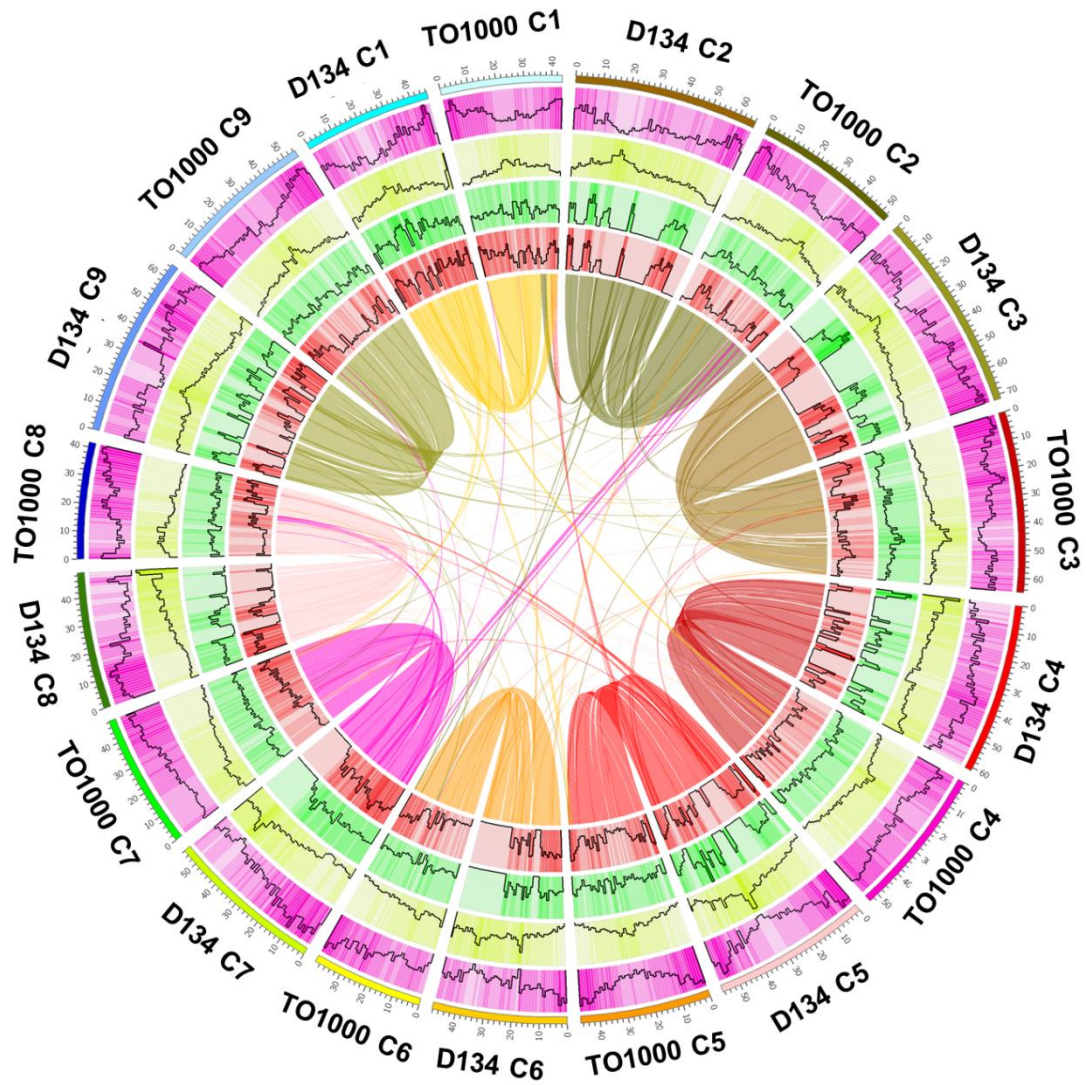

**Fig. S5: Genomic landscape of D134 and TO1000.**

Chromosomes, gene density, TE density, SNP density, indel density and best-hit gene pairs are in order from outside to inside in the Circos images.
